# Supplementary material for: Land–sea coupling of early Pleistocene glacial cycles in the southern North Sea exhibit dominant Northern Hemisphere forcing
Source: Copernicus journal article supplement (doi:10.5194/cp-14-397-2018), 2018-03-23
Supplement: Supplementary file 2 [file Supplementary table S1 Age control_R2.xlsx]

## Sheet: Sheet1
Chronostratigraphic control points		Depth A15-3	Age plotted	Max. age (Ma)	Min. age	Range
1st order	2nd order	mbsl	Ma	Ma	Ma	Ma	Reference calibration
Top Olduvai	FOD Azolla filicoides	441	1.785	1.795	1.775	0.02	(Kuhlmann et al., 2006a; Kasse, 1996)
base Olduvai		564.5	1.942	1.952	1.932	0.02	(Kuhlmann et al., 2006a)
	top MIS 92 (GR*)	810	2.35	2.36	2.34	0.02	(Noorbergen et al., 2015)
	top MIS 93 (GR*)	845	2.373	2.383	2.363	0.02	(Noorbergen et al., 2015)
	top MIS 94 (GR*)	890	2.387	2.397	2.377	0.02	(Noorbergen et al., 2015)
	top MIS 95 (GR*)	905	2.407	2.417	2.397	0.02	(Noorbergen et al., 2015)
	LOD Operculodinium erikianum (A15-4)	906	2.47	2.6	2.34	0.13	(De Schepper and Head, 2008a; De Schepper et al., 2015).
X-event	top MIS 96 (GR*)	918	2.427	2.437	2.417	0.02	(Noorbergen et al., 2015; Kuhlmann et al., 2006a)
	top MIS 97 (GR*)	950	2.452	2.462	2.442	0.02	(Noorbergen et al., 2015)
	top MIS 98 (GR*)	965	2.477	2.487	2.467	0.02	(Noorbergen et al., 2015)
	LOD Invetrocysta lacrymosa (A15-4), scattered	966.8	2.73	2.74	2.72	0.5 **	(Hennissen et al., 2014; De Schepper and Head, 2008).
	top MIS 99 (GR*)	985	2.494	2.504	2.484	0.05	(Noorbergen et al., 2015)
	LOD Melitasphaeridium choanophorum, scattered	990	3	3.3	2.7	0.3	(De Schepper et al., 2017; diachronous, excl. in model)
	top MIS 100 (GR*)	1000	2.51	2.52	2.5	0.02	(Noorbergen et al., 2015)
	top MIS 101 (GR*)	1020	2.54	2.55	2.53	0.02	(Noorbergen et al., 2015)
	top MIS 102 (GR*)	1028	2.554	2.564	2.544	0.02	(Noorbergen et al., 2015)
	LCO Neogloboquadrina atlantica (s)	1048	2.7	3	2.4	0.3	(Weaver and Clement, 1986; Spiegler and Jansen, 1989
G/M boundary	LOD Barssidinium (calibrated at A15-3)	1070	2.582	2.592	2.572	0.02	(Kuhlmann et al., 2006a; De Schepper & Head, 2009)
	FOD Elphidiella hannai, base FA zone	1145	3.5	4	3	0.5	(Doppert, 1980; King, 1983)
	LOD Reticulosphaera actinocoronata	1230	4.45	4.5	4.4	0.05	De Schepper et al., 2015; 2017
	Uvigerina macrocarinata and Bolboforma fragoris	1243	11.15	11.7	10.6	0.55	(Von Daniels, 1986; Spiegler and von Daniels, 1991; Spiegler, 1999)
	Unipontidinium aquaeductum, Apteodinium spiridoides, Palaeocystodinium ventricosum	1280	14.1	15.2	13	1.1	(De Verteuil and Norris, 1996, updated to Ogg et al., 2016)
	LOD= Last occurrence datum, FOD= First occurrence datum, LCO= Last Common Occurrence
	* GR events are correlated to Noordwijk well where they are tuned by high resolution δ18O to LR04 (Noorbergen et al., 2015)
	** Increased range represents disjunct record in A15-4
References
De Verteuil, L., Norris, G., 1996. Miocene dinoflagellate stratigraphy and systematics of Maryland and Virginia. Micropaleontology 42 (supplement, 172 pp.).
De Schepper, S., and M. J. Head (2008a), Age calibration of dinoflagellate cyst and acritarch events in the Pliocene – Pleistocene of the eastern North Atlantic (DSDP Hole 610A),Stratigraphy, 5(2), 137–161
De Schepper, S., Beck, K.M., Mangerud, M., 2017. Late Neogene dinoflagellate cyst and acritarch biostratigraphy for Ocean Drilling Program Hole 642B, Norwegian Sea. Review of Palaeobotany and Palynology. 236: 12-32.
De Schepper, S. Schreck, M. Beck, K.M., Matthiessen, J., Fahl, K., Mangerud, G., 2015. Early Pliocene onset of modern Nordic Seas circulation related to ocean gateway changes. Nature Communications. 6:8659
Doppert, J.W.C., 1980. Lithostratigraphy and biostratigraphy of marine Neogene deposits in the Netherlands. Mededelingen Rijks Geologische Dienst 32-16: 255-311.
Hennissen, J.A.I., Head, M.J., De Schepper, S., Groeneveld, J., 2014. Palynological evidence for a southward shift of the North Atlantic Current at ~2.6 Ma during the intensification of late Cenozoic Northern Hemisphere glaciation. Paleoceanography 29: 564–580.
Kasse, C., 1996. Paleomagnetic dating and effects of Weichselian periglacial processes on the magnetization of early Pleistocene deposits (southern Netherlands, northern Belgium). Geologie en Mijnbouw 75: 19–31
King, C., 1983. Cainozoic micropalaeontological biostratigraphy of the North Sea. Report Institute Geological Sciences 82: 1-40: 6 pl.
Kuhlmann, G., Langereis, C.G., Munsterman, D., van Leeuwen, R.-J., Verreussel, R., Meulenkamp, J., Wong, T.E., 2006a. Chronostratigraphy of Late Neogene sediments in the southern North Sea Basin and paleoenvironmental interpretations. Palaeogeography, Palaeoclimatology, Palaeoecology 239: 426–455. https://doi.org/10.1016/j.palaeo.2006.02.004.
Kuhlmann, G., Langereis, C.G., Munsterman, D., van Leeuwen, R.-J., Verreussel, R., Meulenkamp, J.E., Wong, Th.E., 2006b. Integrated chronostratigraphy of the Pliocene–Pleistocene interval and its relation to the regional stratigraphical stages in the southern North Sea region. Netherlands Journal of Geosciences - Geologie en Mijnbouw 85 (1): 19–35. https://doi.org/10.1017/S0016774600021405.
Noorbergen, L.J., Lourens, L.J., Munsterman, D. K., Verreussel, R.M.C.H., 2015. Stable isotope stratigraphy of the early Quaternary of borehole Noordwijk, southern North Sea .Quaternary International 386: 148 – 157. DOI:10.1016/j.quaint.2015.02.045.
Spiegler, D., 1999. Bolboforma biostratigraphy from the Hatton–Rockall Basin (North Atlantic). In: Raymo, M.E., Jansen, E., Blum, P., Herbert, T.D. (Eds.), Proceedings ODP, Scientific Results, vol. 162. Ocean Drilling Program, College Station, TX, pp. 35–49.
Spiegler, D., Jansen, E., 1989. Planktonic foraminifer biostratigraphy of Norwegian Sea sediments: ODP leg 104. In: Eldholm, O., Thiede, J., Tayler, E., et al. (Eds.), Proceedings of the Ocean Drilling Program, Scientific Results, pp. 681–696.
Spiegler, D., von Daniels, C.H., 1991. A stratigraphic and taxonomic atlas of Bolboforma (Protophytes, incertae Sedis, Tertiary). Journal of Foraminiferal Research 21: 126–158.
Von Daniels, C.H., 1986. Uvigerina in the NW European Neogene. In: van der Zwaan, G.J., Jorissen, F.J., Verhallen, P.J.J.M., von Daniels, C.H. (Eds.), Atlantic–European Oligocene to Recent Uvigerina. Utrecht Micropaleontological Bulletin, vol. 35, pp. 67–119.
Weaver, P.P.E., Clement, B.M., 1986. Synchronicity of Pliocene planktonic foraminiferid datums in the North Atlantic. Marine Micropalaeontology 10: 295–307.
