# Supplementary material for: Land–sea coupling of early Pleistocene glacial cycles in the southern North Sea exhibit dominant Northern Hemisphere forcing
Source: Copernicus journal article supplement (doi:10.5194/cp-14-397-2018), 2018-03-23
Supplement: Supplementary file 4 [file Supplementary table S1 DataA15_palynology.xlsx]

## Sheet: A15-3 %taxa
top	base	Age (spline) (Ma)	Abies #	Acer #	Alchemilla #	Alnus #	Armeria #	Artemisia #	Betula #	Botrychium #	Calluna #	Carpinus #	Carya #	Caryophyllaceae #	Celtis #	Ceratophyllum spines	Chenopodiaceae #	Cirsium #	Classopollis	Comp#Liguliflorae #	Comp#Tubuliflorae #	Corylus #	Cupressaceae #	Cyperaceae #	Dryopteris thelypteris-t#	Epilobium spec#	Equisetum #	Ericales varia	Eucommia #	Fagus #	Fraxinus	Geranium #	Gramineae #	Gramineae >40 µm	Huperzia selago	Indet	Ilex #	Juglans #	Juniperus #	Larix #	Liquidambar #	Lonicera #	Lycopodiella inundata	Lycopodium ANNOTINUM	Lycopodium inundatum	Lycopodium clavatum	Menyanthes #	Mougeotia #	Nuphar #
810	810	2.35	0	0	0	2.73973	0	0	2.05479	0	0	0	0.684932	0.684932	0	0	0	0	0	0	0	0.684932	0.684932	2.73973	18.4932	0	0	18.4932	0	0	0	0	10.274	0	0	0.684932	0	0	0	0	0	0	0	0	0	0.684932	0	0	0
814	814	2.3526	0	0	0	0	0	0	0	0	0	0	0	0	0	0	0	0	0	0	0	0	0	0	0	0	0	0	0	0	0	0	0	0	0	93.1818	0	0	0	0	0	0	0	0	0	0	0	0	0
830	830	2.3631	0	0	0	0	0	0	0	0	0	0	0	0	0	0	0	0	0	0	0	0	0	0	9.33333	0	0	5.33333	0	0	0	0	2.66667	0	0	6.66667	0	0	0	0	0	0	0	0	0	0	0	0	0
838	838	2.3684	0	0	0	0	0	0	0	0	0	0	0	0	0	0	0	0	0	0	0	0	0	0	0	0	0	0	0	0	0	0	0	0	0	100	0	0	0	0	0	0	0	0	0	0	0	0	0
850	850	2.3746	0	0	0	0.684932	0	0	0	0	0	0	1.36986	0	0	0	0	0	0	0	0.684932	0	2.05479	0.684932	10.274	0	0	30.137	0.684932	0	0	0	4.10959	0	0	0.684932	1.36986	0	0	0	0.684932	0	0	0	0	0	0	0	0
870	870	2.3808	0	0	0	4.95868	0	0	0.826446	0	0	0	2.47934	0.826446	0	0	0	0	0	1.65289	0	0.826446	0.826446	0	9.91736	0	0	23.9669	0	0.826446	0	0	5.78512	0	0	0.826446	0	0	0	0	0	0	0	0	0	0.826446	0	0	0
890.05	890.05	2.3871	0	0	0	0.190114	0	0.190114	0.190114	0.190114	0.190114	0	0.380228	0	0	0	0	0	0	0	0	0.380228	0.380228	1.3308	5.89354	0	0	12.7376	0	0.380228	0	0	1.71103	0	0	4.18251	0.95057	0	0.190114	0	0	0	0	0.190114	0	1.14068	0	0	0
890.8	890.8	2.3881	0	0	0	0	0	0	0	0	0	0	0	0	0	0	0	0	0	0	0	0	0	0	0	0	0	0	0	0	0	0	0	0	0	98.1481	0	0	0	0	0	0	0	0	0	0	0	0	0
891.75	891.75	2.3893	0.254453	0	0	0	0	0	0	0	1.52672	0	0	0.254453	0	0	0	0.254453	0	0.508906	0	0	0.254453	7.63359	9.16031	0	0.254453	5.85242	0.254453	0	0.254453	0	2.79898	0	0.254453	0	0	0	0	0.254453	0	0	0	0	0.254453	0	0	0	0
892.8	892.8	2.3907	0	0	0	0	0	0	0	0	7.32861	0	0	0.70922	0	0	0	0	0	0	0	0.236407	0.472813	4.49173	6.61939	0	0	4.01891	0	0	0	0	1.89125	0	0.236407	19.1489	0	0	0.236407	1.18203	0.472813	0	0.70922	0	0	0.945626	0	0	0
893.8	893.8	2.3921	0.733496	0	0	0	0	0	0	0	0.244499	0	0	0	0	0.244499	0	0	0	0.244499	0	0	0.244499	4.15648	11.2469	0	0	7.82396	0	0	0	0	1.46699	0	0.244499	0	0	0	0	0	0	0	0	0	0.244499	1.22249	0	0	0
894.8	894.8	2.3934	0	0	0	0.42796	0.142653	0	0	0	5.84879	0	0.142653	0.285307	0	0	0.142653	0	0	0.142653	0.285307	0.285307	0.285307	3.13837	7.98859	0	0	13.1241	0	0	0	0	2.1398	0	0.285307	0	0	0	0	0.85592	0.285307	0	0.142653	0	0	1.14123	0	0	0
895.8	895.8	2.3947	0	0	0	0	0	0	0	0	6.09137	0.253807	0.253807	0.507614	0	0	0	0	0	0	0	0	0.253807	2.53807	8.62944	0	0.253807	3.04569	0	0	0	0	1.26904	0	0	16.4975	0	0	0	0.507614	0	0	0.253807	0	0.253807	1.01523	0	0	0
896.8	896.8	2.3961	0.169779	0	0	0	0	0	0	0	0.169779	0	0	0	0	0	0	0	0.679117	0	0	0.169779	0.169779	3.73514	8.14941	0	0	3.56537	0	0	0	0	0.509338	0	0.169779	0	0	0	0	0	0.169779	0	0	0	0	0.339559	0	0	0
897.8	897.8	2.3974	0.227015	0	0	0.227015	0	0	0	0	2.72418	0.113507	0.113507	0.227015	0	0	0	0	0	0	0.113507	0.227015	0.227015	4.08627	11.5778	0	0	3.85925	0	0	0	0	0.908059	0	0	0	0	0	0	0.340522	0	0	0	0	0.113507	2.38365	0	0	0
898.8	898.8	2.3987	0.40568	0	0	0	0	0	0	0.20284	0.608519	0	0	0.20284	0	0	0.20284	0	0	0.20284	0	0.20284	0.20284	3.44828	9.73631	0	0.20284	3.85396	0	0	0	0	1.21704	0	0	0	0.20284	0	0	0	0	0	0	0	0	0.40568	0	0	0
899.35	899.35	2.3995	0.245098	0	0	0	0	0	0	0	7.10784	0	0	0	0	0	0	0	0	0.245098	0	0	0.245098	7.59804	7.35294	0	0	4.90196	0	0	0	0	2.69608	0	0	0	0	0	0	0.245098	0	0	0	0	0.245098	0.245098	0	0	0
899.8	899.8	2.4001	0.0947867	0	0	0.0947867	0	0	0	0.189573	0.379147	0.189573	0.0947867	0	0	0	0	0	0	0	0.0947867	0.189573	0.189573	3.98104	9.76303	0	0	5.6872	0	0	0	0	0.473934	0.189573	0.0947867	0	0	0	0	0	0.0947867	0	0	0.0947867	0	0.379147	0	0	0
900.8	900.8	2.4014	0.25	0.25	0	0.25	0	0	0	0	11.5	0	0.25	0	0	0	0	0.25	0	0.25	0.25	0.25	0.25	5.25	11.25	0	0.25	4.5	0	0	0	0	1.25	0	0	0	0	0	0	1	0	0	0.5	0	0.25	0.25	0.25	0	0
901.8	901.8	2.4027	0.309598	0	0	0	0.309598	0	0	0	26.6254	0	0.309598	0	0.309598	0	0.309598	0	0	0.309598	0	0	1.54799	2.16718	10.8359	0	0.309598	1.85759	0	0	0	0	0.928793	0	0	0	0	0	0	1.85759	0	0	0	0	0.619195	0.619195	0	0	0
902.8	902.8	2.4041	0	0	0	0	0	0	0	0.268097	2.41287	0.268097	0	0.268097	0	0	0	0	0	0.268097	0	0	0	2.68097	13.6729	0	0	16.3539	0	0	0	0	0.80429	0	0	0	0	0	0	0	0.268097	0	0	0	0	0.268097	0.268097	0	0
903.85	903.85	2.4055	0	0	0	0	0	0	0	0	0.970874	0	0	0.138696	0	0	0.138696	0.138696	0	0.138696	0	0	0	3.6061	11.2344	0.277393	0.138696	16.0888	0	0	0	0	1.66436	0	0	0	0	0	0	0	0	0	0	0	0	1.66436	0.138696	0.138696	0
904.43	904.43	2.4062	0	0	0	0.625	0	0	0	0	0	0	0	0.625	0	0	0	0	0	0.625	0	0	0	3.125	14.375	0	0	7.5	0	0	0	0	3.125	0	0	1.875	0.625	0	0	0	0	0	0	0	0	0	0	0	0
904.8	904.8	2.4067	0	0	0	0.589971	0	0	0	0	0.884956	0	0	0	0	0	0	0	0	0	0	0	0	4.12979	16.5192	0	0	5.01475	0	0	0	0	0.294985	0.294985	0	0	0	0	0	0	0	0	0	0	0	0.884956	0	0	0
904.8	904.8	2.4067	0.303951	0	0	0	0	0	0	0	9.42249	0.303951	0	0.303951	0	0	0	0	0	0	0	0	0.303951	3.95137	9.42249	0	0.303951	0.911854	0	0	0	0	1.82371	0	0	0	0	0	0	0.607903	0	0	0.303951	0	0.303951	1.82371	0	0	0
905.26	905.26	2.4074	0	0	0	0.314465	0	0	0	0	13.2075	0	0	0.314465	0	0	0.314465	0	0	0	0	0	0	2.83019	7.2327	0	0	1.88679	0	0	0	0	1.88679	0	0	0	0	0	0	0.628931	0	0	0.628931	0	0	2.20126	0	0	0
908	908	2.4116	0	0	0	0.699301	0	0	0.699301	0	0	0.699301	0	0	0	0	0	0	0	0.699301	0	0	0	6.29371	19.5804	0	0	9.79021	0	0	0	0	4.1958	0	0	4.1958	0.699301	0	0	1.3986	0	0	0	0	0	1.3986	0	0	0
917.55	917.55	2.4263	0	0	0	0	0	0	0	0	0.591716	0	0	0	0	0	0	0	0	0.295858	0.295858	0	2.66272	0	14.7929	0	0	0.887574	0	0	0	0	0.887574	0	0	0	0	0	0.295858	0	0	0	0	0	0	2.07101	0	0	0
918.15	918.15	2.4271	0	0	0	0	0	0	0	0	0	0	0	0.496278	0	0	0	0	0	0.744417	0	0	2.72953	0.744417	18.8586	0	0	1.98511	0	0	0	0	1.24069	0	0	11.1663	0	0	0.248139	0	0	0	0	0	0	0.744417	0	0	0
918.15	918.15	2.4271	0	0	0	0	0	0	0	0	0	0	0	0.560224	0	0	0	0	0	0.840336	0	0	3.08123	0.840336	21.2885	0	0	2.2409	0	0	0	0	1.40056	0	0	0	0	0	0.280112	0	0	0	0	0	0	0.840336	0	0	0
920	920	2.4286	0	0.178891	0	0.357782	0	0	0	0	0.357782	0	0	0	0.178891	0	0	0	0	0.715564	0	0.357782	0.178891	6.26118	10.5546	0	0	6.08229	0	0	0	0	1.07335	0	0	0	0	0	0	0	0	0	0	0.178891	0	0.178891	0	0	0
920	920	2.4286	0	0	0	0	0	0	0	0	0	0	0	0.322581	0	0	0	0	0	0.645161	0.322581	0.322581	3.54839	0.645161	10.9677	0	0	3.87097	0	0	0	0	0	0	0	0	0	0	0	0	0	0	0.322581	0	0	0.645161	0	0	0.322581
920.6	920.6	2.429	0	0.636943	0	0.636943	0	0	0	0	0	0	0.636943	0.636943	0	0	0	0	0	0	0	0	1.91083	5.09554	7.64331	0	0	15.2866	0	0	0	0	4.4586	0	0	0	0	0	0.636943	0	0	0	0	0	0	0	0	0	0
920.95	920.95	2.4293	0	0	0	0	0	0	0	0	0	0	0	0.757576	0	0	0	0	0	0.757576	0	0	0	0	9.09091	0	0	4.54545	0	0	0	0	0	0	0	0	0	0	0	0	0	0	0	0	0	0	0	0	0.757576
921.05	921.05	2.4294	0	0	0	0	0	0	0	0	0	0	0	0	0	0	0	0	0	0	0	0.746269	0.746269	0	8.20896	0	0	5.22388	0	0	0	0	0.746269	0	0	0	0	0	0	0	0	0	0	0	0	0.746269	0	0	0
921.95	921.95	2.4301	0	0	0	0	0	0	0	0	0.310559	0	0	0.310559	0	0	0	0	0	0	0.621118	0	0.621118	0.310559	7.76398	0	0	4.96894	0.621118	0	0	0	0.310559	0	0	0	0	0	0	0	0	0	0.310559	0.931677	0	0.310559	0	0	0
923	923	2.4309	0	0	0	0.338983	0	0	0	0	0	0.338983	0	0	0	0	0	0	0	0	0	0	0.677966	0.338983	3.38983	0	0	6.44068	0	0.338983	0	0	0.338983	0	0	0	0	0	0	0	0	0	0	0.677966	0	0.677966	0	0	0.338983
924	924	2.4317	0	0	0	0	0.33557	0	0	0	1.34228	0	0	0	0	0	0	0	0	0.33557	0.33557	0.33557	0.33557	0	5.03356	0	0	3.3557	0.33557	0.33557	0	0	1.00671	0	0	0	0	0	0	0	0	0	0	0.33557	0	0.671141	0	0	0.33557
924.5	924.5	2.4321	0	0	0	0	0	0	0	0	0.3367	0.3367	0	0.3367	0	0	0	0.3367	0	0.3367	0.3367	0	0	0	2.6936	0	0	3.7037	0.3367	0	0	0	0	0	0	0	0	0	0	0	0	0	0	0	0	0.673401	0	0	0
925	925	2.4325	0	0	0	0	0	0	0	0	1.38889	0	0	0	0	0	0	0	0	1.38889	0.347222	0	1.38889	0	6.59722	0	0	3.125	0	0	0	0	3.125	0	0	0	0	0	0	0	0	0	0	0	0	2.08333	0	0	0
926.55	926.55	2.4337	0	0	0	0	0	0	0	0	0.673401	0	0	0.3367	0	0	0	0	0	0.3367	0	0	0.3367	0	2.6936	0	0	2.0202	0.3367	0	0	0	0	0	0	0	0	0	0	0	0	0	0	0	0	0.3367	0	0	0
926.7	926.7	2.4338	0	0	0	0	0.341297	0	0	0	0.682594	0	0	0.341297	0	0	0	0	0	0.341297	0	0	1.36519	0	1.70648	0	0	4.09556	0	0	0	0	0	0	0	0	0	0	0	0	0	0	0	0	0	0.682594	0	0	0
927.76	927.76	2.4346	0	0	0	0	0	0	0	0	0.306748	0	0	0	0	0	0	0	0.306748	0	0	0	0.613497	0.306748	3.37423	0	0	1.22699	0	0	0	0	0.306748	0	0	0	0	0	0	0	0	0	0	0	0	1.53374	0	0	0
928.45	928.45	2.4352	0	0	0	0	0	0	0	0.239234	0.717703	0	0	0.239234	0	0	0	0	0	0	0	0	0	0	3.11005	0	0	2.39234	0	0	0	0	0	0	0	0	0	0	0	0	0	0	0	0	0	1.67464	0	0	0
928.5	928.5	2.4352	0	0	0	0	0	0	1.40845	0	0	0	1.40845	0	0	0	0	0	0	0	1.40845	0	4.22535	7.04225	2.8169	0	0	0	0	0	0	0	5.6338	0	0	4.22535	0	0	0	0	0	0	0	0	0	0	0	0	0
929.2	929.2	2.4358	0	0	0	0	0	0	0	0	0	0	0	0	0	0	0	0	0	0	0	0	0	1.47059	4.41176	0	0	1.47059	0	0	0	0	0	0	0	0	0	0	0	0	0	0	0	0	0	1.47059	0	0	0
929.95	929.95	2.4363	0	0	0	0	0	0	0	0.340136	0.340136	0	0	0.340136	0	0	0	0	0	0.340136	0.340136	0	0	0	2.72109	0	0	1.36054	0	0	0	0	0	0	0	0	0	0	0	0	0.340136	0	0.680272	0.340136	0	1.36054	0	0	0
935.9	935.9	2.441	0	0	0	0	0	0	0	0.330033	1.32013	0.330033	0	0	0	0	0	0	0	0	0.330033	0	0.660066	0	3.9604	0	0	5.28053	0.330033	0	0	0	0	0	0	0	0	0	0	0	0	0	0.330033	0.330033	0	0.660066	0	0	0.330033
936.9	936.9	2.4418	0	0	0	0	0.301205	0	0	0.301205	0.903614	0	0	0.301205	0	0	0	0	0	0.301205	0.301205	0	0.903614	0.903614	3.01205	0	0	1.80723	0.301205	0	0	0	0.60241	0	0	0	0	0	0	0	0	0	0	0.301205	0	1.80723	0	0	0
938.9	938.9	2.4433	0	0	0	0	0	0	0.338983	0.338983	0.677966	0	0	0.338983	0	0	0	0	0	0.338983	0	0	0.338983	0	5.08475	0	0	3.05085	0.338983	0	0	0	0	0	0	0	0	0	0	0	0	0	0	0.338983	0	1.01695	0	0	0
939.8	939.8	2.444	0	0	0	0	0	0	0	0	0.398406	0	0	0	0	0	0	0	0	0.398406	0	0	0	0	1.99203	0	0	3.58566	0	0	0	0	0.398406	0	0	0	0	0	0	0	0	0	0	0.398406	0	0.398406	0	0	0
940.9	940.9	2.4449	0	0	0	0	0	0	0	0	0.56338	0	0	0	0	0	0	0	0	0.28169	0	0	1.12676	0.56338	5.35211	0	0	3.09859	0	0	0	0	1.97183	0	0	0	0	0	0.56338	0	0.28169	0	0	0	0	0.84507	0	0	0
941.9	941.9	2.4457	0	0	0	0	0	0	0	0	0	0	0	0	0	0	0	0	0	0	0	0	0	0	0	0	0	0	0	0	0	0	0	0	0	100	0	0	0	0	0	0	0	0	0	0	0	0	0
942.9	942.9	2.4465	0	0	0	0	0.383142	0	0	0	0.766284	0	0	0	0	0	0	0	0	0	0.383142	0	0.383142	0	4.5977	0	0	2.68199	0	0	0	0	1.14943	0	0	0	0	0	0	0	0.383142	0	0	0	0	0.766284	0	0	0
943.85	943.85	2.4472	0	0	0	0.288184	0	0	0	0	1.72911	0	0.288184	0.288184	0	0	0	0	0	0	0.288184	0	0.864553	0	2.88184	0	0	8.93372	0.288184	0	0	0	0	0	0.288184	0	0	0	0	0	0	0	0	0.576369	0	2.88184	0	0	0
944.5	944.5	2.4477	0	0	0	0.689655	0	0	0	0	0	0.689655	0	0	0	0	0	0	0	1.37931	0.689655	0	2.75862	0.689655	6.2069	0	0	16.5517	0	0	0	0	18.6207	0	0	0	0	0	0	0	0	0	0	0	0	0	0	0	0
945.9	945.9	2.4488	0	0	0	0	0	0	0.299401	0	0	1.79641	0	0	0	0	0	0	0	0	0.299401	0.299401	0.598802	0	4.49102	0	0	9.88024	0.299401	0	0	0	0.598802	0	0	0	0	0	0	0	0	0	0	0	0	1.49701	0	0	0
946.8	946.8	2.4495	0	0	0	0.2849	0.2849	0	0.2849	0	3.1339	0	0.2849	0.2849	0	0	0	0	0	0.569801	0	0.2849	0.569801	4.2735	9.68661	0	0.569801	7.97721	0	0	0	0.2849	7.40741	0	0	2.849	0	0	0.2849	0	0	0	0.2849	0	0	0	0	0	0
946.91	946.91	2.4496	0	0	0	0	0	0	0.316456	0	0.949367	0	0	0.316456	0	0	0	0	0	0.316456	0.316456	0	0.632911	0	8.22785	0	0	6.01266	0	0	0	0	0.316456	0	0	0	0	0	0	0	0.316456	0	0	0.316456	0	1.26582	0	0	0
947.74	947.74	2.4502	0	0	0	0.327869	0	0	0.327869	0.327869	0.655738	0	0	0.327869	0	0	0	0.327869	0	0.327869	0	0.327869	0.655738	0.327869	3.93443	0	0	6.88525	0.327869	0	0	0	0	0	0	0	0	0	0	0	0.327869	0	0	0.983607	0	0.983607	0	0	0.327869
953.25	953.25	2.4574	0	0	0	0	0	0	0	0	0	0	0	0	0	0	0	0	0	0	0	0	0	0	0	0	0	0	0	0	0	0	0	0	0	100	0	0	0	0	0	0	0	0	0	0	0	0	0
954.15	954.15	2.4589	0	0	0	0	0	0	0	0	0.323625	0	0	0.323625	0	0	0	0.323625	0	0	0	0	0	0	4.53074	0	0	8.09061	0	0	0	0	0	0	0	0	0	0	0	0	0	0	0	0	0	0.647249	0	0	0
955.2	955.2	2.4607	0	0	0	0	0	0	0	0	2.06186	0	0	0	0	0	0	0	0	0.343643	0	0	0	0	6.87285	0	0	4.12371	0	0	0	0	0	0	0	0	0	0	0	0	0.343643	0	0.343643	0	0	0.687285	0	0	0
955.6	955.6	2.4613	0	0	0	0	0	0	0.75188	0	0	0	0.75188	0	0	0	0	0	0	0	0	0	2.25564	14.2857	6.76692	0	0	7.5188	0	0	0	0	21.0526	0	0	7.5188	0	0	0	0	0	0	0	0	0	0	0	0	0
956.18	956.18	2.4623	0	0	0	0	0	0	0	0	1.51515	0	0	0.30303	0	0	0	0	0	0.30303	0.30303	0	0	0	8.78788	0	0	2.12121	0	0	0	0	0	0	0	0	0	0	0	0	0	0	0	0.30303	0	1.81818	0	0	0
956.31	956.31	2.4625	0	0	0	0	0	0	0	0	1.07143	0	0	0	0	0	0	0	0	0	0.357143	0	0	0	5.35714	0	0	1.42857	0.357143	0	0	0	0	0	0	0	0	0	0	0	0	0	0	0	0	1.78571	0	0	0
957.3	957.3	2.4642	0	0	0	0	0	0	0	0	0.292398	0	0	0	0	0	0	0	0	0	0	0	0	0	7.60234	0	0	4.67836	0	0	0	0	0	0	0	0	0	0	0	0	0	0	0	0	0	1.16959	0	0	0
957.34	957.34	2.4642	0	0	0	0	0	0	0	0	0.289017	0	0	0	0	0	0	0	0	0.289017	0.289017	0.289017	0	0	9.53757	0.289017	0	4.33526	0	0	0	0	0	0	0	0	0	0	0	0	0	0	0	0.289017	0	1.7341	0	0	0
958.25	958.25	2.4658	0	0	0	0	0	0	0	0	0.687285	0	0	0.343643	0	0	0	0	0	0	0	0	0	0	6.87285	0	0	1.71821	0	0	0	0	0.343643	0	0	0	0	0	0	0	0	0	0	0.343643	0	1.03093	0	0	0
959.2	959.2	2.4673	0	0	0	0	0	0	0	0	0	0	0	0	0	0	0	0	0	0	0	0	0	0	0	0	0	0	0	0	0	0	0	0	0	96.9697	0	0	0	0	0	0	0	0	0	0	0	0	0
960.67	960.67	2.4698	0	0	0	0	0	0	0	0.263158	0.526316	0	0	0	0	0	0	0	0	0	0.263158	0	1.05263	0	10.7895	0	0	2.36842	0.526316	0	0	0	0.263158	0	0	0	0	0	0	0	0	0	0	0	0	1.05263	0	0	0
961.4	961.4	2.471	0	0	0	0	0	0	0	0	0	0	0	0	0	0	0	0	0	0	0	1.05263	0	0	3.15789	0	0	0	0	0	0	0	5.26316	0	0	5.26316	1.05263	0	0	0	0	0	0	0	0	3.15789	0	0	1.05263
961.4	961.4	2.471	0	0	0	0	0	0	0	0.275482	0.275482	0	0	0	0	0	0	0	0	0	0.275482	0	0.275482	0	10.1928	0	0	3.85675	0.826446	0	0	0	0	0	0	0	0	0	0	0	0	0	0	0	0	1.37741	0	0	0
962.2	962.2	2.4723	0	0	0	0.469484	0	0	0	0	0	0	0	0	0	0	0	0.469484	0	0	0	0	0	0	10.3286	0	0	4.69484	0.469484	0	0	0	0	0	0	0	0	0	0	0	0	0	0.469484	0	0	3.28638	0	0	0
963.17	963.17	2.474	0	0	0	0	0	0	0	0	0	0	0	0	0	0	0	0	0	0	0	0	0	0	4.65116	0	0	0.775194	0	0	0	0	0	0	0	0	0	0	0	0	0	0	0	0	0	2.32558	0	0	0
964.14	964.14	2.4756	0	0	0	0	0	0	0	0	2.7027	0	0	0	0	0	0	1.35135	0	0	0	0	0	0	12.1622	0	0	9.45946	0	0	0	0	0	0	0	0	0	0	0	0	0	0	0	0	0	1.35135	0	0	0
975	975	2.4855	0	0	0	0.684932	0	0	2.05479	0	0	0	0	0	0	0	0	0	0	0	0	0.684932	0	4.10959	9.58904	0	0	30.137	0	0	0	0	4.79452	0	0	5.47945	0	0	0	0	0	0	0	0	0	0	0	0	0
985	985	2.494	0	0	0	0.609756	0	0	0	0	0	0	0	0	0	0	0.609756	0	0	0	0	0	0	0.609756	6.09756	0	0	26.2195	0	0	0	0	2.43902	0	0	0.609756	0	0	0	0	0	0	0	0	0	0	0	0	0
990	990	2.4993	0	0	0	0.606061	0	0	0	0	0	0	0.606061	0	0	0	0.606061	0	0	0.606061	0	0.606061	1.21212	0.606061	20	0	0	15.7576	0	0	0	0	4.24242	0	0	0	0	0	0	0	0	0	0	0	0	0	0	0	0
995	995	2.5047	0	0	0	0	0	0	0	0	0	0	0	0	0	0	0	0	0	1.23457	0	0	0	0	12.3457	0	0	7.40741	0	0	0	0	0	0	0	2.46914	0	0	0	0	0	0	0	0	0	1.23457	0	0	0
1015	1015	2.5325	0	0	0	0.641026	0	0	0	0	0	0	0	0	0	0	0	0	0	0	0	1.28205	1.28205	5.12821	14.1026	0	0	17.9487	0	0	0	0	7.05128	0	0	2.5641	0	0	0	0	0	0	0	0	0	0	0	0	0
1030	1030	2.5561	0	0	0	0	0	0	0.735294	0	0	0	0.735294	0	0	0	0	0	0	0.735294	0	0	2.20588	8.08824	16.1765	0	0	16.1765	0	0	0	0	8.08824	0	0	0	0.735294	0	0	0	0	0	0	0	0	0	0	0	0
1050	1050	2.5755	0	0	0	0.645161	0	0	0	0	0	0	0	0	0	0	0	0	0	0	0.645161	0	1.29032	1.29032	7.74194	0	0	17.4194	0	0	0	0	3.87097	0	0	5.80645	0.645161	0	7.09677	0	0	0	0	0	0	0	0	0	0
1070	1070	2.58	0	0	0	2.83688	0	0.70922	0	0	0	0	0	0.70922	0	0	0.70922	0	0	0	0	0.70922	0.70922	0.70922	11.3475	0	0	9.92908	0	0	0	0	2.12766	0	0	4.25532	0.70922	0	0	0	0	0	0	0	0	0	0	0	0
[truncated: 157 more columns]

## Sheet: A15-4 %taxa
top	base	splice to 03	Age (spline) (Ma)	Abies #	Acer #	Alnus #	Armeria #	Artemisia #	Betula #	Botrychium	Calluna #	Carpinus #	Carya #	Caryophyllaceae #	Centaurea cyanus	Cirsium	Chenopodiaceae #	Comp#Liguliflorae #	Comp#Tubuliflorae #	Corylus #	Cunninghamia #	Cupressaceae #	Cyperaceae #	Deltoidospora	Dryopteris linnaeana	Dryopteris thelypteris-t#	Ericales varia	Epilobium spec#	Eucommia #	Fagus #	Fraxinus #	Galium #	Gramineae #	Ilex #	Indet #	Juglans #	Larix #	Liquidambar #	Lycopodiella inundata	Lycopodium inundatum	Lycopodium SPEC#	Mougeotia #	Myriophyllum verticilatum	Nuphar #	Nyssa #	Osmunda #	Ostrya-T# #	Ovoidites #	Pediastrum #
918.4	918.4	901.724	2.4026	0	0	1.08696	0	0	0.543478	0	0	0	0	0	0	0	0	0	0.543478	0	0	0	0	0	0	0.543478	37.5	0	0	1.08696	0	0	2.17391	0	0	0	0	0	0	0	1.63043	0	0	0	0	4.34783	0	0	0
921.95	921.95	904.784	2.4067	0	0	0	0	0	0	0	0	0	0	0	0	0	0	0	0	0	0	0	1.84049	0	0	1.84049	11.6564	0	0	0	0	0	2.76074	0	0	0	0	0	0	0	0.306748	0	0	0	0	2.45399	0	0	0
923.73	923.73	906.319	2.409	0	0	0.9375	0	0	0	0	0	0	0	0	0	0	0	0	0	0.3125	0	0.3125	7.5	0	0	9.375	6.5625	0	0	0	0	0	0.625	0	0	0	0	0	0	0.3125	1.5625	0	0	0	0	7.5	0	0	0
924.1	924.1	906.6	2.4095	0	0	0	0	0	0	0	4.23453	0	0	0	0	0	0	0	0	0	0	0.325733	2.60586	0.651466	0	8.46906	1.62866	0	0	0	0	0	0	0	0	0	0	0	0	0	1.30293	0	0	0	0	1.62866	0	0	0
924.45	924.45	906.94	2.41	0	0	0.668896	0	0	0	0	1.00334	0	0	0	0	0	0.334448	0.334448	0	0.334448	0	0	2.67559	0.334448	0	15.3846	10.0334	0	0	0	0	0	1.00334	0	0	0	0	0	0	0	0.668896	0	0	0	0	4.01338	0	0	0
924.75	924.75	907.2	2.4104	0	0	0	0.314465	0	0	0	5.03145	0	0	0	0	0	0	0	0	0	0	0.314465	6.28931	0.628931	0	9.43396	1.88679	0	0	0	0	0.314465	0.628931	0	0	0	0	0	0.314465	0	0.314465	0.314465	0	0	0	7.54717	0	0	0
925.1	925.1	907.5	2.4108	0	0	0.396825	0	0	0.396825	0	2.38095	0	0	0	0	0	0	0.396825	0	0.396825	0	0	0.396825	0.396825	0	6.74603	4.7619	0	0	0	0	0	0	0	0.793651	0	0	0	0	0	6.34921	0	0	0	0	7.93651	0	0	0.396825
925.45	925.45	907.8	2.4113	0.314465	0	0	0	0	0	0	5.34591	0	0	0.314465	0	0	0	0	0	0.314465	0	0.314465	4.08805	0.943396	0	11.9497	1.57233	0	0	0	0	0	0.314465	0	0	0	0	0	0.943396	0	0.943396	0	0	0	0	4.71698	0	0	0
926	926	908.276	2.412	0	0	0	0	0	0	0	0	0	0	0	0	0	0	0	0	0	0	0	0.46729	0	0	0.46729	10.2804	0	0	0	0	0	1.86916	0	0	0	0	0	0	0	0	0	0	0	0	6.07477	0	0	0
926.45	926.45	908.65	2.4126	0	0	0	0	0	0	0	9.00901	0	0	0	0	0	0	0.3003	0.3003	0	0	0	1.5015	0	0	12.012	1.2012	0	0	0	0	0	0.3003	0	0	0	0	0	0	0	1.5015	0	0	0	0	3.003	0	0	0
926.8	926.8	908.966	2.4131	0	0	0	0	0	1.66667	0	1.66667	0	1.66667	0	0	0	0	0	0	0	0	0	0	0	0	10	1.66667	0	0	0	0	0	0	0	0	0	0	0	0	0	3.33333	0	0	0	0	6.66667	0	0	0
927	927	909.05	2.4132	0	0	0.31746	0	0	0	0	10.4762	0.31746	0	0.31746	0	0	0	0	0.31746	0	0	0	2.22222	0	0	8.88889	1.90476	0	0	0	0	0	1.26984	0	0	0	0	0	0	0	1.5873	0	0.31746	0	0	1.90476	0	0	0
927.45	927.45	909.526	2.414	0	0	0	0	0	0	0	0.884956	0	0	0	0	0	0	0	0	0	0	0	0	1.32743	0	3.53982	12.8319	0	0	0	0	0	0	0.442478	1.32743	0	0	0	0	0	0.884956	0	0	0	0	10.6195	0	0	0
927.8	927.8	909.82	2.4144	0	0	0	0	0	0	0	5.23077	0	0	0	0	0	0	0.307692	0	0	0	0.307692	1.84615	0.307692	0	7.07692	1.53846	0.307692	0	0	0	0	0	0	0	0	0	0	0	0	1.23077	0	0	0	0.307692	2.15385	0	0	0
928	928	910.005	2.4147	0	0	0	0	0	0	0	0	0.338983	0	0.338983	0	0	0	0	0	0	0	0.338983	0	0	0	4.40678	2.37288	0	0	0	0	0	0	0	0	0	0	0	0	0	3.05085	0	0	0	0	6.77966	0	0	0
928.75	928.75	911.061	2.4163	0	0	0	0	0	0	0	0	0	0	0	0	0.289017	0	0.289017	0	0	0	0	0	0	0	9.24855	4.33526	0	0	0	0	0	0.578035	0	0	0	0	0	0	0	0.578035	0	0	0	0	8.09249	0	0	0.289017
929.5	929.5	912.143	2.418	0	0	0	0	0	0	0	0	0	0	0	0	0	0	0	0	0	0	0	0.490196	0	0	1.47059	7.84314	0	0	0.245098	0	0	0.245098	0	0	0	0	0	0	0	0	0	0	0	0	1.96078	0	0	0
929.55	929.55	912.188	2.4181	0	0	0	0	0	0	0	0.754717	0	0	0	0	0	0	0.377358	0	0	0	0	0	0	0	3.77358	3.39623	0	0	0	0	0	0	0	0	0	0	0	0	0	0.754717	0	0	0	0	4.90566	0	0	0.377358
930.25	930.25	913.214	2.4196	0	0	0	0	0	0	0	0.357143	0	0	0	0	0	0	0	0.357143	0	0	0.357143	0	0	0	3.92857	5	0	0	0	0	0	0	0	0	0	0	0	0	0	0.357143	0	0	0	0	1.78571	0	0	0
938.1	938.1	923.1	2.431	0	0	0	0	0	0	0	0	0	0	0	0	0	0	0.512821	0	0	0	0	3.58974	0	0	2.05128	5.12821	0	0	0	0	0	1.53846	0	0	0	0	0	0	0	0	0	0	1.02564	0	0	0	0	3.58974
943.6	943.6	928.6	2.4353	0	0	0	0	0	0	0	0	1.96078	0.653595	0	0	0	0	0	0	0	0	0	3.92157	0	0	0	5.22876	0	0	1.96078	0	0	0	0	0	0	0	0	0	0	0	0	0	0	0	0	0	0	3.92157
971.4	971.4	956.4	2.4627	0.283286	0	0	0	0	0	0	0	0	0	0	0	0	0	0	0	0.283286	0	0	0.566572	0	0	2.26629	9.06516	0	0	0	0.283286	0	0.849858	0	0	0	0	0	0	0	0.566572	0	0	0	0	13.0312	0	0	0
974.85	974.85	959.85	2.4684	0	0	0	0	0	0	0	0	0	0	0	0	0	0	0	0	0	0	0	0	0	0	0.985222	3.94089	0	0	0.492611	0	0	0.985222	0	0	0	0	0	0	0	1.47783	0	0	0	0	6.40394	0	0	0
975.1	975.1	960.1	2.4688	0	0	0	0	0	0	0	0	0	0	0	0	0	0	0	0	0	0	0	0	0	0	13.1148	1.63934	0	0	0	0	0	0	0	0	0	0	0	0	0	4.91803	0	0	0	0	9.83607	0	0	0
976.8	976.8	961.8	2.4717	0	0	0	0	0	0	0	1.05634	0	0	0	0	0	0	0	0	0	0	0	0	0	0	6.69014	2.46479	0	0.352113	0	0	0	0	0	0	0	0	0	0.352113	0	3.16901	0	0	0	0	3.52113	0	0	0
977.45	977.45	962.45	2.4728	0	0	0	0	0	0.31746	0	0	0	0	0	0	0	0	0.31746	0	0.31746	0	0	0.634921	0	0	1.90476	3.80952	0	0.31746	0.31746	0	0	2.85714	0	0	0	0	0	0	0	1.26984	0	0	0.31746	0	0.634921	0	0	0
978.3	978.3	963.3	2.4742	0	0	0	0	0	0	0	0	0	0	0	0	0	0	0	0	0	0	0.378788	0	0	0	3.78788	5.30303	0	0	0	0	0	0	0	0	0	0	0	0	0	1.13636	0	0	0	0	1.13636	0	0	0.378788
978.85	978.85	963.85	2.4751	0.387597	0	0	0	0	0	0	0	0.775194	0	0	0	0	0	0	0	0	0	0	0	0	0	1.55039	8.91473	0	0	0.387597	0	0	0.387597	0	0	0	0	0	0	0	0	0	0	0.387597	0	0	0	0	0
980.8	980.8	965.8	2.4777	0	0	0.355872	0	0	0	0.355872	1.06762	0	0	0	0	0	0	0.355872	0.355872	0	0	0.711744	0	0	0	4.62633	7.82918	0	0	0	0	0	0	0	0	0	0	0.355872	0	0	1.06762	0	0	0	0	1.77936	0	0	2.4911
981.8	981.8	966.8	2.4785	0	0	0	0	0	0	0	0	0	0	0	0	0	0	0	0.280899	0.280899	0	0	1.1236	0	0	0.280899	13.4831	0	0	0	0	0	0	0	0	0	0	0.280899	0	0	0.280899	0	0	0	0	0.561798	0	0	0.280899
983.5	983.5	968.5	2.48	0	0	0	0	0	0	0	0.854701	0	0	0	0	0	0	0.2849	0.2849	0.2849	0	0.2849	0	0	0	6.26781	11.396	0	0.2849	0	0	0	0.2849	0	0	0	0	0	0	0	2.2792	0	0	0	0	3.7037	0	0	0
984.5	984.5	969.5	2.4808	0	0	0	0	0.298507	0	0	2.38806	0	0.597015	0.298507	0	0	0	0	0.298507	0	0	0	0	0	0	4.77612	11.3433	0	0	0	0	0	0.298507	0	0	0	0	0	0.298507	0	0.597015	0	0	0	0	2.98507	0	0	1.19403
984.8	984.8	969.8	2.4811	0	0	0	0	0	0	0	0	0	0	0	0	0	0	0.581395	0	0	0	0	0	0	0	0	25	0	0.581395	1.16279	0	0	1.16279	0	0	0	0	0	0	0	0.581395	0	0	0	0	1.74419	0	0	0.581395
986.15	986.15	971.064	2.4822	0	0	0	0	0	0	0.302115	1.20846	0	0	0	0	0	0	0.302115	0.302115	0	0	0.302115	0	0	0	4.22961	7.85498	0	0.60423	0	0	0	0	0	0	0	0	0	0	0	2.71903	0	0	0	0	5.13595	0	0	0.906344
987.15	987.15	972	2.483	0	0	0	0	0	0	0	0	0	0	0	0	0	0	0	0	0	0	0	1.93237	0	0	0.966184	27.5362	0	0.483092	0.483092	0	0	6.76329	0	0	0	0	0	0	0	1.44928	0	0	0	0	1.44928	0	0	0
988.5	988.5	973.256	2.484	0	0	0	0	0	0	0	0	0	0	0	0	0	0	0	0	0	0	0	0	0	0	0.403226	33.0645	0	0	0.806452	0	0	3.62903	0	0	0	0	0	0	0	0	0	0	0	0	1.6129	0	0	0.403226
989	989	973.716	2.4844	0	0	0	0	0	0	0	0	0	0.30581	0	0	0	0	0.30581	0	0.30581	0	0.30581	0	0	0	4.58716	14.3731	0	0.611621	0	0	0	0	0	0	0	0	0	0	0	0.917431	0	0	0	0	2.44648	0	0	1.83486
997.8	997.8	981.907	2.4914	0	0	0	0	0	0	0	0	0	0	0	0	0	0	0	0.293255	0.293255	0	0	0.879765	0	0	1.17302	14.3695	0	0	0	0	0	2.05279	0	0	0	0	0.879765	0	0	0	0	0	0	0	1.17302	0	0	0.293255
999.8	999.8	983.767	2.493	0	0	0	0	0	0	0	0	0	0	0	0	0	0	0	0	0	0	0	1.33333	0	0	0	13.3333	0	0	0	0	0	0.266667	0.266667	0	0	0	0	0	0	1.33333	0	0	0	0	2.66667	0	0	0
1003.8	1003.8	987.488	2.4967	0	0	0	0	0	0.45045	0	0	0	0	0	0	0	0	0	0	0	0	0	0.45045	0	0	3.6036	7.20721	0	0	0	0.900901	0	1.35135	0	0	0	0	0	0	0	0	0	0	0	0	9.00901	0	0	0.45045
1008.35	1008.35	991.721	2.5012	0.502513	0	0	0	0	0	0	0	0.502513	0	0	0	0	0	0	0	0	0	0	2.01005	0	0	1.00503	5.02513	0	0	0	0	0	0	0	0	0	0	0	0	0	0	0	0	0	0	5.52764	0	0	0
1011.3	1011.3	994.465	2.5041	0	0	0	0	0	0	0	0	0	0	0	0	0	0	0	0	0	0	0	0.909091	0	0	3.63636	9.09091	0	0	0	0.909091	0	0.909091	0	0	0	0	0	0	0	0	0	0	0	0	4.54545	0	0	0
1014.3	1014.3	997.256	2.5071	0	0	0	0	0	0.675676	0	0	0	0	0	0	0	0	0	0.675676	0	0	0	2.7027	0	0	2.7027	6.08108	0	0	0	0	0	0	0	0	0	0	0	0	0	0	0	0	0	0	17.5676	0	0	1.35135
1064	1064	1037.69	2.5642	0.288184	0	0	0	0	0.288184	0	0	1.44092	0	0.288184	0.288184	0	0	0	0	0	0	0	0	0	0.288184	0	18.1556	0	0	0	0	0	0.576369	0	0	0	0.288184	0	0	0	0	0	0	0	0	0.288184	0	0	1.15274
1067	1067	1040	2.5666	0.70922	0	0.531915	0	0	0.531915	0	0	0.177305	0.177305	0	0	0	0	0.35461	0.177305	0.70922	0	0	0	0	0	0	8.68794	0	0	0.177305	0	0	1.77305	0	1.41844	0	0.531915	0	0	0	11.5248	0	0	0	0	0	0	0	0
1070	1070	1042.31	2.569	1.15894	0	1.82119	0	0	0.496689	0	0	0.331126	0.496689	0.165563	0	0	0	0	0.165563	0.165563	0	0	1.98675	0	0	0	10.4305	0	0	0.331126	0	0	5.13245	0	1.3245	0	0.662252	0	0	0	9.60265	0	0	0	0	0	0	0	0
1073	1073	1044.62	2.5715	0	0.215517	0.215517	0	0	1.07759	0	0	0	0	0	0	0	0.215517	0	0.215517	0	0	0	1.2931	0	0	0	10.9914	0	0	0.215517	0	0	2.58621	0.215517	1.2931	0	0	0.215517	0	0.646552	7.75862	0	0	0	0	0	0	0.646552	0
1076	1076	1046.92	2.5739	0.225734	0	2.25734	0	0	1.12867	0	0	0	1.58014	0	0	0	0	0	0.225734	1.12867	0	0	0.225734	0	0	0	11.2867	0	0	0.225734	0	0	7.22348	0	0.902935	0	0.451467	0.225734	0	0	3.83747	0	0	0	0	0.225734	0.451467	0.225734	0
1079	1079	1049.23	2.5753	0.229885	0	0.45977	0	0	1.14943	0	0	0.45977	0	0	0	0	0.45977	0	0	0.229885	0.229885	0.91954	0.689655	0	0	0	5.74713	0	0	0.229885	0	0	8.27586	0	0.45977	0	0.689655	0.229885	0	0	3.21839	0	0	0	0	1.6092	0	0.689655	0
1082	1082	1051.54	2.5758	0.833333	0	0.208333	0	0.208333	0.833333	0	0	0	0.625	0	0	0	0	0	0	0.208333	0.208333	1.45833	0.625	0	0	0	13.9583	0	0	0.416667	0	0	4.58333	0	0.833333	0	0.208333	0	0	0	5.83333	0	0	0	0	0.208333	0	0.416667	0.208333
1084	1084	1053.08	2.5762	0	0	0	0	0	1.31579	0	0	0.263158	0.526316	0	0	0	0	0	0.263158	0	0.263158	4.21053	0.526316	0	0	0	5	0	0	0.526316	0	0	4.73684	0	0.263158	0.263158	0.526316	0	0	0	4.21053	0	0	0	0	0.263158	0	0.263158	0
1085	1085	1053.85	2.5763	0.185185	0	0.185185	0	0	1.11111	0	0	0.555556	0.740741	0	0	0	0.37037	0	0	0.37037	0	2.96296	0.925926	0	0	0	2.77778	0	0	0.185185	0	0	3.51852	0.185185	0.925926	0	0	0	0	0	3.14815	0	0	0	0	1.11111	0	0.555556	0
1086	1086	1054.62	2.5765	0	0	1.34048	0	0.268097	0.536193	0	0	0.268097	0	0	0	0	1.87668	0	0	0.268097	0	1.87668	0.268097	0	0	0	2.94906	0	0	0.536193	0.268097	0	3.21716	0	1.60858	0	0.536193	0	0	0	3.75335	0	0	0	0	2.14477	0.268097	0	0
1088	1088	1056.15	2.5769	0	0	0.290698	0	0	0.290698	0	0	0	0	0	0	0	1.45349	0	0	0	0	1.74419	0.581395	0	0	0	3.19767	0	0	0	0	0	1.74419	0	2.03488	0	1.45349	0	0	0.872093	4.36047	0	0	0	0	1.45349	0.581395	0	0
1089.9	1089.9	1057.62	2.5772	0.238663	0	0.596659	0	0	0	0	0	0.357995	0	0	0	0	1.19332	0	0.119332	0	0	0.357995	0.238663	0	0	0	2.38663	0	0	0.238663	0	0	5.2506	0	0.71599	0	0.477327	0	0	0	5.36993	0	0	0	0	0.477327	0	0	0.835322
[truncated: 93 more columns]

## Sheet: A15-3&4 indices paly
Depth (mbsl) splice	Age (splice) (Ma)	% cold Dinos	% Coastal dinos	% Protoperidiniods		%AP ( Pinus excl. from AP)	% AP (with Ericales in NAP, Pinus excl from AP)	Terrestrial/marine ratio	% Ericaceae total	% Pinus
810	2.35	13.8614	68.3168	0		14.4737	10.6796	0.476684	18.4932	20.5479
814	2.3526	11.3208	51.8519	0		0	...	0.805054	0	0
830	2.3631	...	...	...		0	0	0.919355	5.33333	61.3333
838	2.3684	16.3265	6.12245	0		0	...	0.766667	0	0
850	2.3746	...	44.4444	0		25	12.5	0.870504	30.137	27.3973
870	2.3808	44.4444	25.3333	1.33333		38.2979	23.6842	0.581006	23.9669	28.0992
890.05	2.3871	17.1429	45.7143	2.85714		30.5556	20.7547	0.95283	12.9278	39.7338
890.8	2.3881	37.5	21.875	0		0	...	0.908309	0	0
891.75	2.3893	...	...	...		21.2598	17.3077	...	7.37913	45.0382
892.8	2.3907	10.5263	10	20		20.354	14.2857	0.971182	11.3475	31.2057
893.8	2.3921	...	...	...		16.5289	12.987	...	8.06846	48.1663
894.8	2.3934	...	...	0		15.8163	9.42249	0.998851	18.9729	38.2311
895.8	2.3947	42	12	22		17.6471	13.0435	0.925373	9.13706	31.4721
896.8	2.3961	...	...	...		23.2143	19.403	...	3.73514	64.8557
897.8	2.3974	...	...	...		18.6722	15.0502	0.999131	6.58343	52.5539
898.8	2.3987	...	...	...		22.9358	19.084	...	4.46247	54.9696
899.35	2.3995	...	...	...		15.2381	10.3896	...	12.0098	50.9804
899.8	2.4001	...	...	...		22.4138	17.5676	...	6.06635	57.6303
900.8	2.4014	...	...	...		26.1905	17.3684	...	16	42.25
901.724	2.4026	23.0769	11.5385	3.84615		27.2727	10.6195	0.875598	37.5	30.4348
901.8	2.4027	...	...	...		17.7966	10	...	28.483	21.9814
902.8	2.4041	38.7755	13.7931	1.72414		16.8224	10.1695	0.978039	18.7668	35.6568
903.85	2.4055	...	...	...		15.6098	9.7561	...	17.0596	38.1415
904.43	2.4062	10.1695	53.3333	23.3333		8.4507	7.22892	0.684211	7.5	33.125
904.784	2.4067	6.66667	72.5	7.5		17.0732	8.86076	0.543726	11.6564	69.0184
904.8	2.4067	15.7895	11.4943	5.17241		23.2143	19.697	0.612472	5.89971	35.3982
904.8	2.4067	...	...	...		18.0851	13.2813	...	10.3343	44.3769
905.26	2.4074	...	...	...		17.3333	10.5691	...	15.0943	43.7107
906.319	2.409	11.2583	19.8675	2.64901		13.253	10.5769	0.403162	6.5625	51.25
906.6	2.4095	23.3533	9.58084	7.18563		39.0805	32.381	0.552279	5.86319	54.3974
906.94	2.41	12.8205	25	6.41026		31.6832	23.8806	0.650224	11.0368	40.4682
907.2	2.4104	13.6905	27.9762	3.57143		33.3333	27.8195	0.728595	6.91824	42.1384
907.5	2.4108	8.86076	50.6329	6.96203		40.6977	33.6538	0.416974	7.14286	39.2857
907.8	2.4113	14.1104	31.9018	8.58896		25.7143	21.2598	0.480892	6.91824	50.6289
908	2.4116	3.8835	85.4369	2.91262		15.6627	13.4021	0.258993	9.79021	11.8881
908.276	2.412	17.7515	30.9942	9.94152		62.5	32.6087	0.541555	10.2804	68.2243
908.65	2.4126	28.4091	10.7955	1.70455		18.75	14.3836	0.75657	10.2102	48.3483
908.966	2.4131	24.7525	1.96078	7.84314		44	40.7407	0.696429	3.33333	45
909.05	2.4132	31.875	4.96894	8.07453		20.1835	14.8649	0.661765	12.381	51.746
909.526	2.414	21.3333	2.63158	3.94737		69.4915	45.5556	0.638095	13.7168	38.4956
909.82	2.4144	17.2414	4	2.85714		27.027	20.8333	0.513889	6.76923	63.3846
910.005	2.4147	...	...	...		39.5349	34	...	2.37288	70.1695
911.061	2.4163	...	...	...		35.5932	28.3784	...	4.33526	63.0058
912.143	2.418	29.3578	17.2727	8.18182		56.7568	30.4348	0.54918	7.84314	78.4314
912.188	2.4181	...	...	...		48.2759	35	...	4.15094	73.5849
913.214	2.4196	...	...	...		36	22.5	...	5.35714	77.5
917.55	2.4263	...	...	...		16.4557	15.4762	...	1.47929	55.9172
918.15	2.4271	10.5263	0	4.34783		14.5455	13.5593	0.693333	1.98511	41.9355
918.15	2.4271	...	...	...		14.5455	13.5593	...	2.2409	47.3389
920	2.4286	...	...	...		8.06452	6.25	...	6.44007	62.254
920	2.4286	...	...	...		24.5614	20.2899	...	3.87097	67.4194
920.6	2.429	9.09091	5.45455	30.9091		19.2982	13.5802	0.694444	15.2866	36.3057
920.95	2.4293	...	...	...		6.66667	4.7619	...	4.54545	71.9697
921.05	2.4294	...	...	...		25	18.5185	...	5.22388	74.6269
921.95	2.4301	...	...	...		15.2174	11.1111	...	5.2795	71.7391
923	2.4309	...	...	...		26.6667	16.3265	...	6.44068	75.5932
923.1	2.431	10.5263	0	11.8421		17.3913	12.1212	0.711027	5.12821	75.3846
924	2.4317	...	...	...		16.129	11.1111	...	4.69799	72.1477
924.5	2.4321	...	...	...		11.7647	6.89655	...	4.0404	79.4613
925	2.4325	...	...	...		14.5455	11.7647	...	4.51389	65.9722
926.55	2.4337	...	...	...		25	16.6667	...	2.6936	76.0943
926.7	2.4338	...	...	...		31.25	16.6667	...	4.77816	78.8396
927.76	2.4346	...	...	...		16	13.3333	...	1.53374	82.8221
928.45	2.4352	...	...	...		7.40741	5	...	3.11005	83.4928
928.5	2.4352	...	0	63.6364		16.6667	16.6667	0.90678	0	49.2958
928.6	2.4353	4.54545	0	50		54.5455	40	0.823755	5.22876	75.1634
929.2	2.4358	...	...	...		12.5	11.1111	...	1.47059	73.5294
929.95	2.4363	...	...	...		22.2222	18.75	...	1.70068	80.6122
935.9	2.441	...	...	...		24.1379	14.2857	...	6.60066	72.2772
936.9	2.4418	...	...	...		27.027	21.7391	...	2.71084	71.3855
938.9	2.4433	...	...	...		18.5185	13.1579	...	3.72881	81.0169
939.8	2.444	...	...	...		29.4118	18.5185	...	3.98406	81.6733
940.9	2.4449	...	...	...		22.2222	17.9104	...	3.66197	70.9859
941.9	2.4457	27.5	5	27.5		0	...	0.896641	0	0
942.9	2.4465	...	...	...		16	11.7647	...	3.44828	82.7586
943.85	2.4472	...	...	...		23.7288	14.5833	...	10.6628	59.9424
944.5	2.4477	...	...	12.5		16.9492	12.0482	0.942857	16.5517	25.5172
945.9	2.4488	...	...	...		30.9091	19.3182	...	9.88024	61.3772
946.8	2.4495	...	...	...		11.9048	9.09091	0.990991	11.1111	39.3162
946.91	2.4496	...	...	...		12.963	9.21053	...	6.96203	67.4051
947.74	2.4502	...	...	...		28.2609	18.8406	...	7.54098	69.1803
953.25	2.4574	25.5814	3.48837	13.9535		0	...	0.803653	0	0
954.15	2.4589	...	...	...		25	13.7931	...	8.41424	70.8738
955.2	2.4607	...	...	...		7.14286	4.34783	...	6.18557	70.7904
955.6	2.4613	11.4286	46.6667	5.71429		16	14.1176	0.453125	7.5188	18.0451
956.18	2.4623	...	...	...		13.4615	10.9375	...	3.63636	67.2727
956.31	2.4625	...	...	...		26.4706	21.9512	...	2.5	73.2143
956.4	2.4627	10.9756	23.7805	10.9756		56.3636	35.6322	0.428571	9.06516	59.2068
957.3	2.4642	...	...	...		31.5789	24.3243	...	4.97076	61.4035
957.34	2.4642	...	...	...		35.7143	29.0698	...	4.62428	61.2717
958.25	2.4658	...	...	...		35.5556	30.7692	...	2.4055	68.3849
959.2	2.4673	5.43478	14.8936	12.766		0	...	0.702532	0	0
959.85	2.4684	11.1111	22.7941	9.55882		40	28.5714	0.390135	3.94089	75.3695
960.1	2.4688	...	...	...		15.3846	14.2857	...	1.63934	55.7377
960.67	2.4698	...	...	...		50	44.8598	...	2.89474	53.4211
961.4	2.471	26.3636	34.5455	4.54545		28.5714	28.5714	0.411765	0	58.9474
961.4	2.471	...	...	...		35.2941	28.9157	...	4.13223	62.259
961.8	2.4717	...	...	...		3.0303	2.32558	...	3.52113	72.8873
962.2	2.4723	...	...	...		20.4545	16.6667	...	4.69484	50.2347
962.45	2.4728	10.7527	1.07527	21.5054		25.641	19.6078	0.599138	3.80952	79.3651
963.17	2.474	...	...	...		44.4444	42.1053	...	0.775194	65.1163
963.3	2.4742	...	...	...		17.6471	9.67742	...	5.30303	78.0303
963.85	2.4751	14.6667	1.33333	29.3333		46.6667	18.4211	0.722222	8.91473	81.0078
964.14	2.4756	...	...	...		14.2857	8.69565	...	12.1622	39.1892
965.8	2.4777	...	...	...		20	10.9091	...	8.8968	70.4626
966.8	2.4785	13.0435	0	46.7391		39.1304	12.6761	0.670251	13.4831	76.4045
968.5	2.48	...	...	...		14	7.52688	...	12.2507	62.6781
969.5	2.4808	...	...	...		4.7619	2.27273	...	13.7313	65.9701
969.8	2.4811	31.4607	0	28.8889		28.5714	7.01754	0.649805	25	61.6279
971.064	2.4822	...	...	...		15.2174	9.21053	...	9.06344	64.9547
972	2.483	30.4348	0	47.8261		29.2683	12.2449	0.809129	27.5362	48.3092
973.256	2.484	12.5	0	22.4138		26.8293	8.94309	0.751073	33.0645	45.5645
973.716	2.4844	...	...	...		20.5882	8.64198	...	14.3731	65.4434
975	2.4855	26.8293	16.8675	6.0241		15.0943	8.24742	0.569948	30.137	23.9726
981.907	2.4914	54.8148	0	11.6788		25	13.7615	0.388393	14.3695	63.9296
983.767	2.493	18.3099	0	12.6761		27.6923	15.6522	0.554859	13.3333	63.2
985	2.494	43.1193	10.0917	0		6.25	3.2967	0.384181	26.2195	35.9756
987.488	2.4967	6.50407	18.6992	4.87805		45.6522	33.871	0.508	7.20721	46.8468
990	2.4993	19.3878	21.4286	2.04082		15.942	11.5789	0.546296	15.7576	30.303
991.721	2.5012	11.1801	8.07453	8.07453		47.0588	29.6296	0.375969	5.02513	64.8241
994.465	2.5041	13.7405	9.16031	3.05344		20	10	0.444915	9.09091	63.6364
995	2.5047	12	16	4.8		10.5263	8	0.309392	7.40741	53.0864
997.256	2.5071	10.3448	19.1781	10.9589		25	16	0.345291	6.08108	53.3784
1015	2.5325	28.7037	17.5926	7.40741		18.5714	13.2653	0.465347	17.9487	25
1030	2.5561	42.9907	5.60748	2.80374		12.1212	9.09091	0.439791	16.1765	29.4118
1037.69	2.5642	31.0345	1.72414	29.3103		36	10.2273	0.742222	18.1556	71.7579
1040	2.5666	21.5686	0	11.7647		27.5862	20.6186	0.777293	8.68794	61.8794
1042.31	2.569	51.0638	0	4.25532		30.8108	22.9839	0.799145	10.4305	53.8079
1044.62	2.5715	32.1839	0	6.89655		21.8182	14.9068	0.682482	10.9914	60.5603
1046.92	2.5739	12.1951	0	7.31707		38.9313	28.1768	0.528736	11.2867	52.8217
1049.23	2.5753	4.7619	1.5748	13.3858		54.8611	46.7456	0.51711	5.74713	53.7931
1050	2.5755	25	4.54545	4.54545		33.8983	23.2558	0.572816	17.4194	30.9677
1051.54	2.5758	13.7255	0.980392	10.7843		41.2698	26.943	0.552632	13.9583	55.4167
1053.08	2.5762	...	...	...		54.0146	47.4359	...	5	52.8947
1053.85	2.5763	7.18954	20.1299	5.84416		62.8743	57.6923	0.421053	2.77778	61.2963
1054.62	2.5765	6.34921	57.672	3.7037		60.9091	55.3719	0.354949	2.94906	59.2493
1056.15	2.5769	11.5385	34.3511	3.81679		67	60.3604	0.458678	3.19767	61.6279
1057.62	2.5772	13.6752	1.69492	11.0169		37.6344	33.9806	0.544402	2.38663	70.1671
1070	2.58	14.5631	20.3883	2.91262		18.75	15.3846	0.497561	9.92908	31.2057
