# Supplementary material for: Land–sea coupling of early Pleistocene glacial cycles in the southern North Sea exhibit dominant Northern Hemisphere forcing
Source: Copernicus journal article supplement (doi:10.5194/cp-14-397-2018), 2018-03-23
Supplement: Supplementary file [file cp-14-397-2018-supplement-title-page.pdf › cp-14-397-2018-supplement-title-page.pdf]

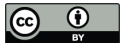

## *Supplement of*

# **Land–sea coupling of early Pleistocene glacial cycles in the southern North Sea exhibit dominant Northern Hemisphere forcing**

**Timme H. Donders et al.**

*Correspondence to:* Timme H. Donders ([t.h.donders@uu.nl](mailto:t.h.donders@uu.nl))

- [cp-14-397-2018-supplement-title-page.pdf](#)
- [Figure S1 maps.pdf](#)
- [Figure S2\\_pollen\\_all.pdf](#)
- [Figure S3Agedepth.pdf](#)
- [Figure S4 well tie.pdf](#)
- [Figure S5 bisaccates.pdf](#)
- [Figure S6\\_GDGT.pdf](#)
- [Supplementary figures and data descriptions\\_R2Text.docx](#)
- [Supplementary table S1 Age control\\_R2.xlsx](#)
- [Supplementary table S1 DataA15GeochemistryR1.xlsx](#)
- [Supplementary table S1 DataA15\\_palynology.xlsx](#)

The copyright of individual parts of the supplement might differ from the CC BY 4.0 License.
