# Supplementary figures and images for: Land–sea coupling of early Pleistocene glacial cycles in the southern North Sea exhibit dominant Northern Hemisphere forcing
Source: Copernicus journal article supplement (doi:10.5194/cp-14-397-2018), 2018-03-23

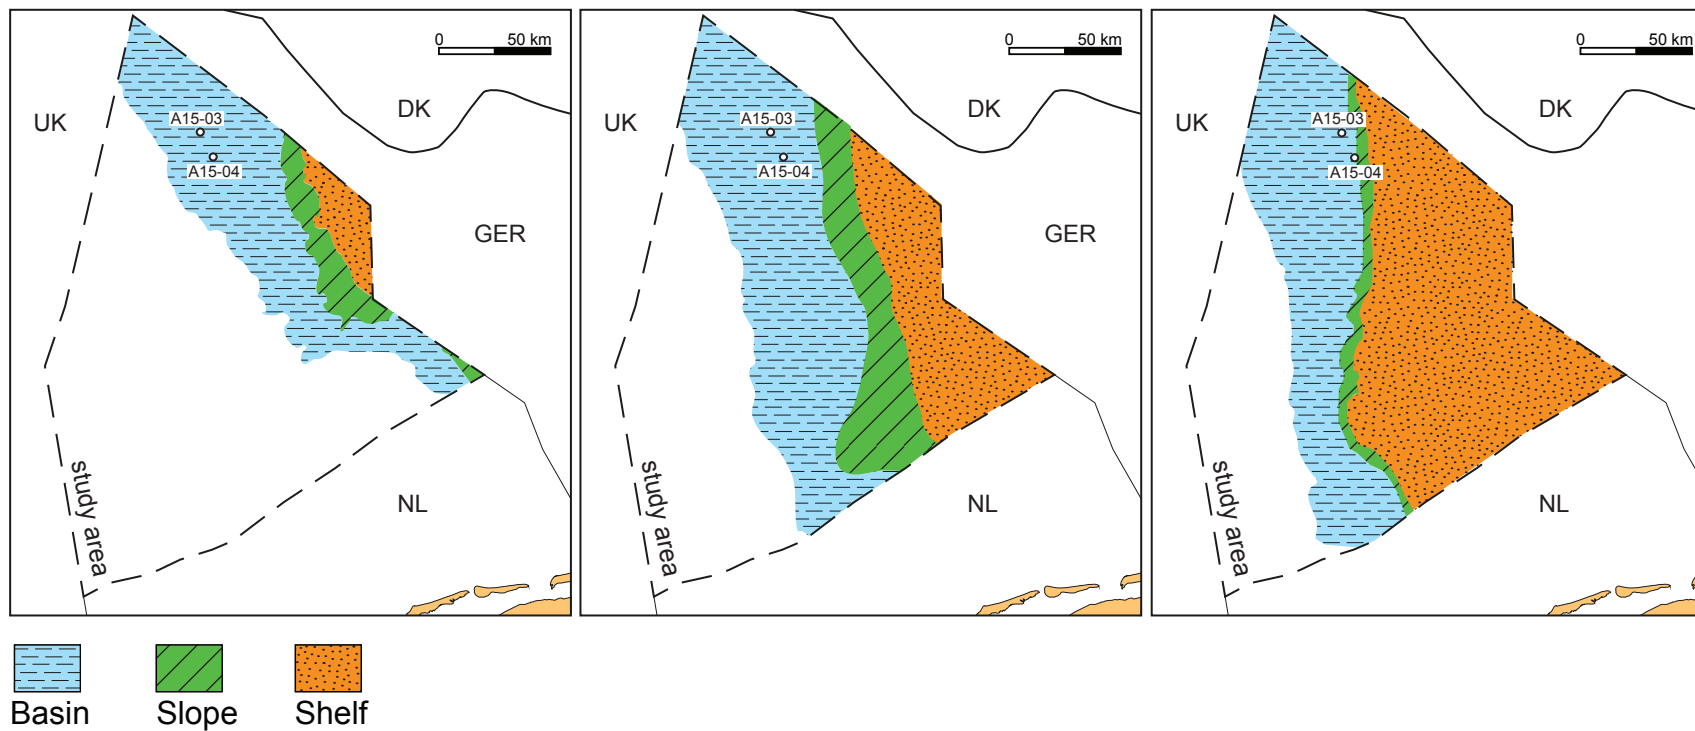

Supplement: Supplementary file 1 [file Figure S1 maps.pdf › Figure S1 maps.pdf]

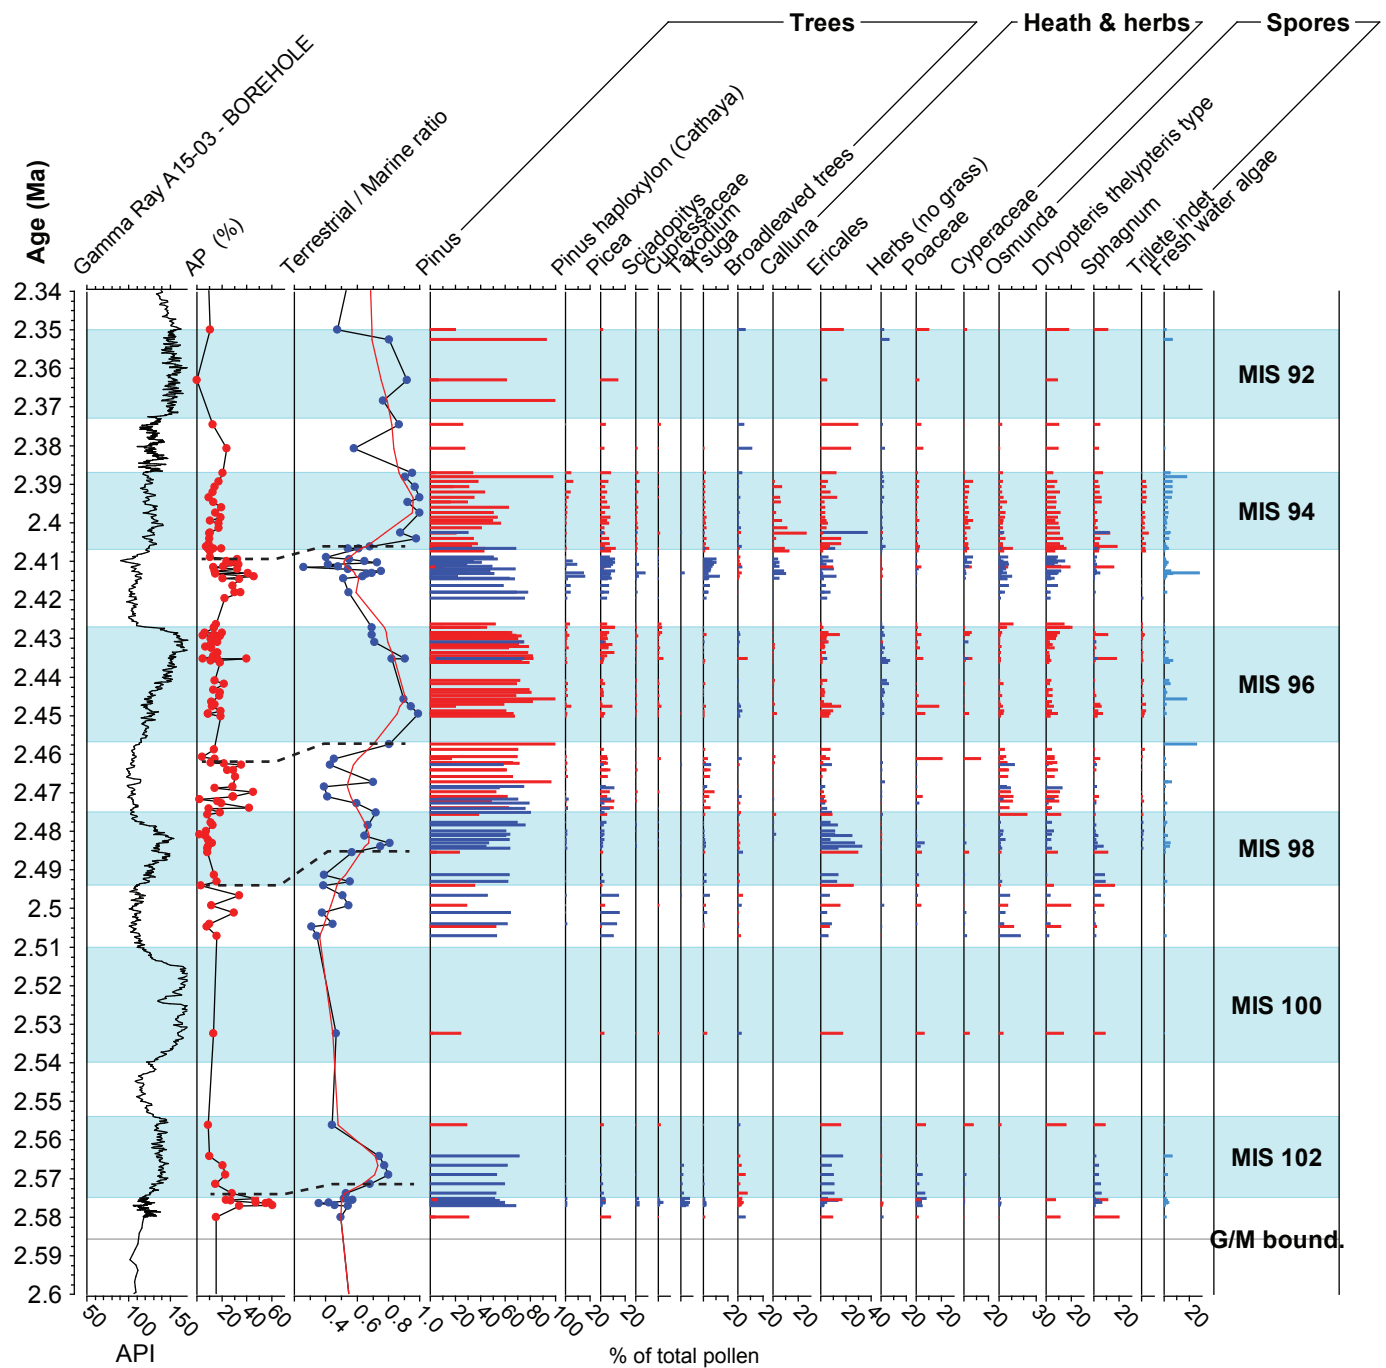

Supplement: Supplementary file 2 [file Figure S2_pollen_all.pdf › Figure S2_pollen_all.pdf]

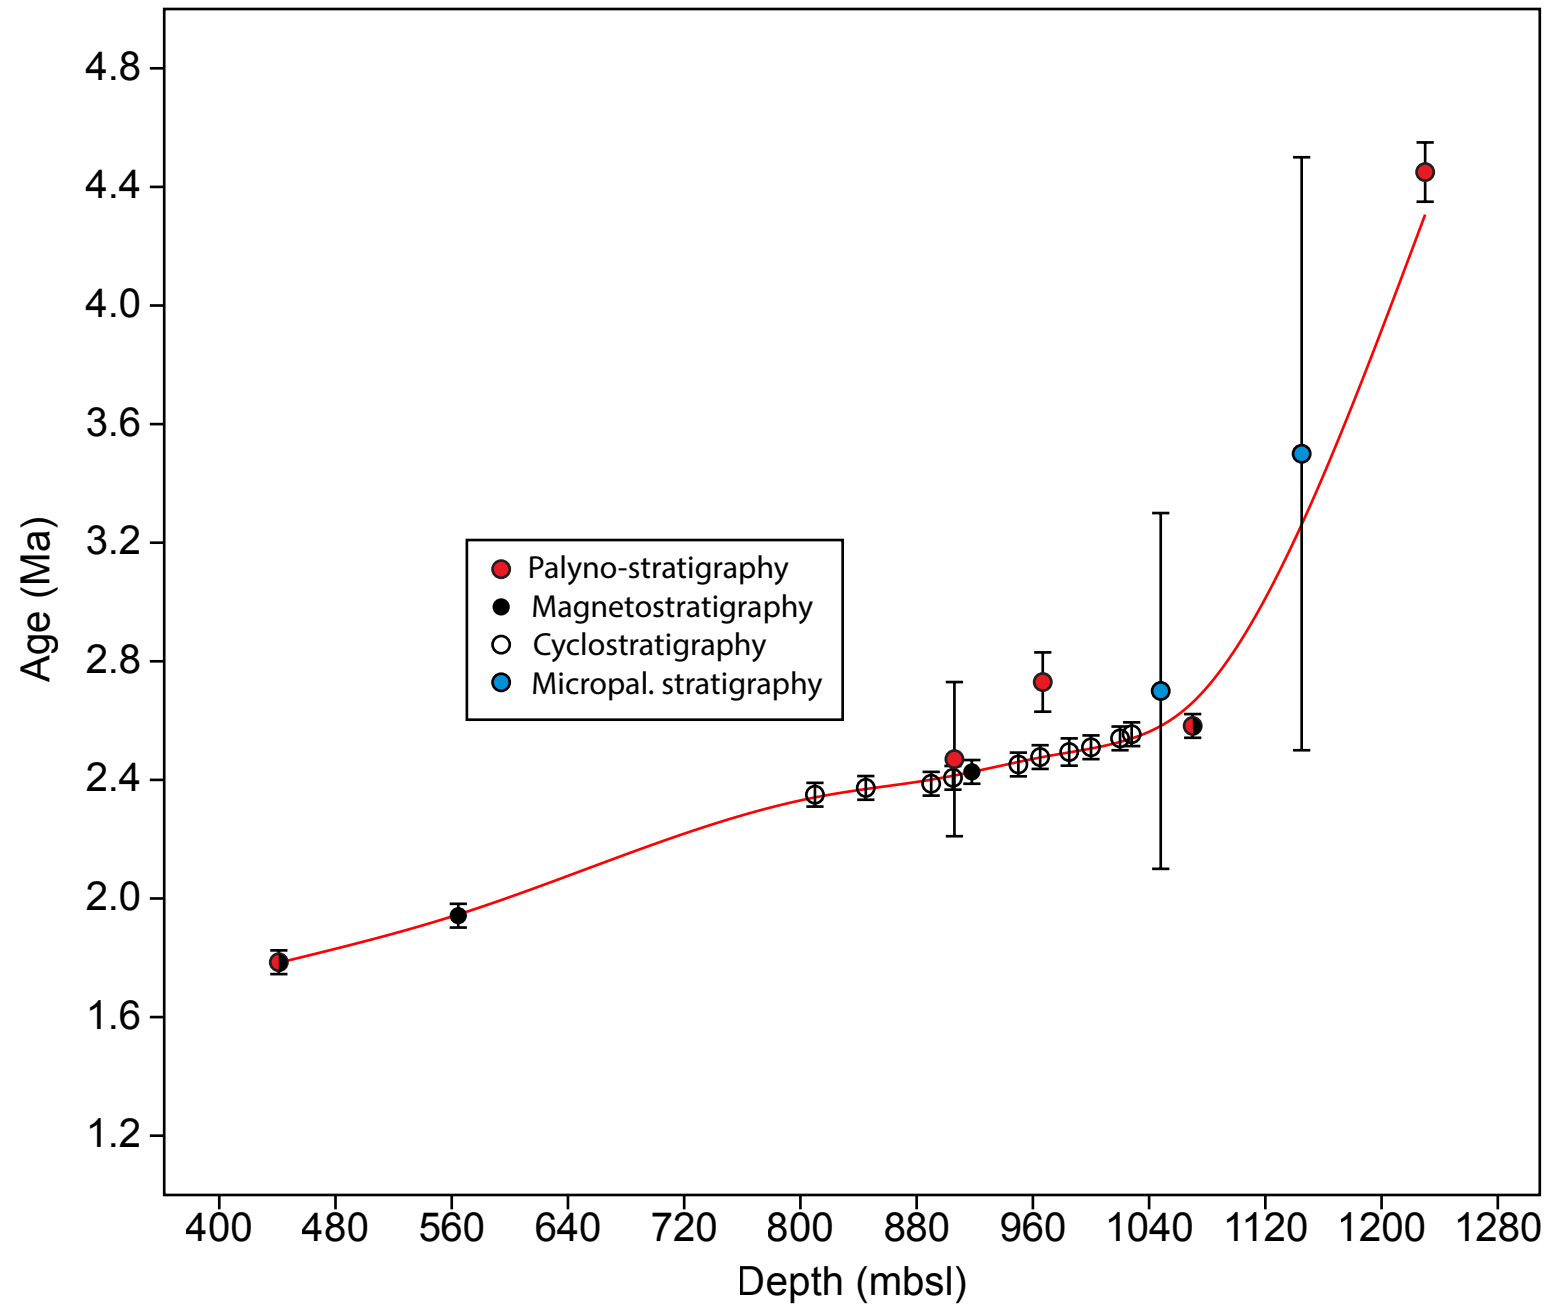

Supplement: Supplementary file 3 [file Figure S3Agedepth.pdf › Figure S3Agedepth.pdf]

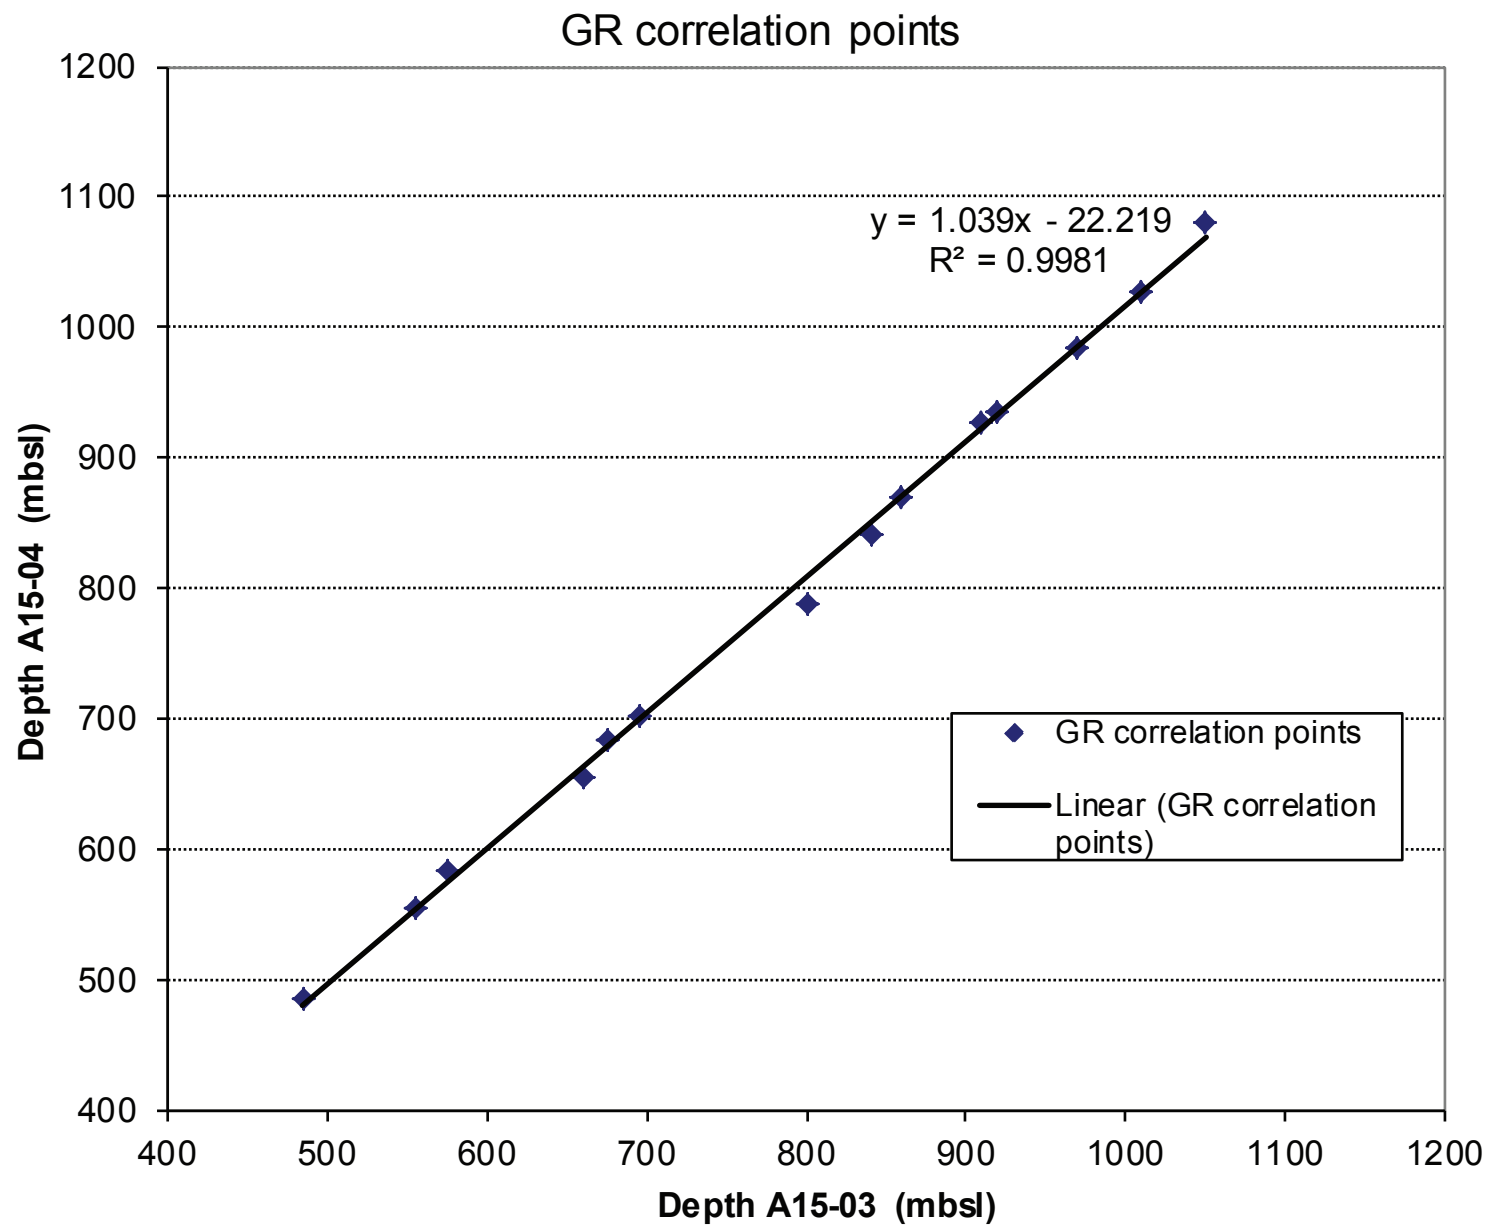

Supplement: Supplementary file 4 [file Figure S4 well tie.pdf › Figure S4 well tie.pdf]

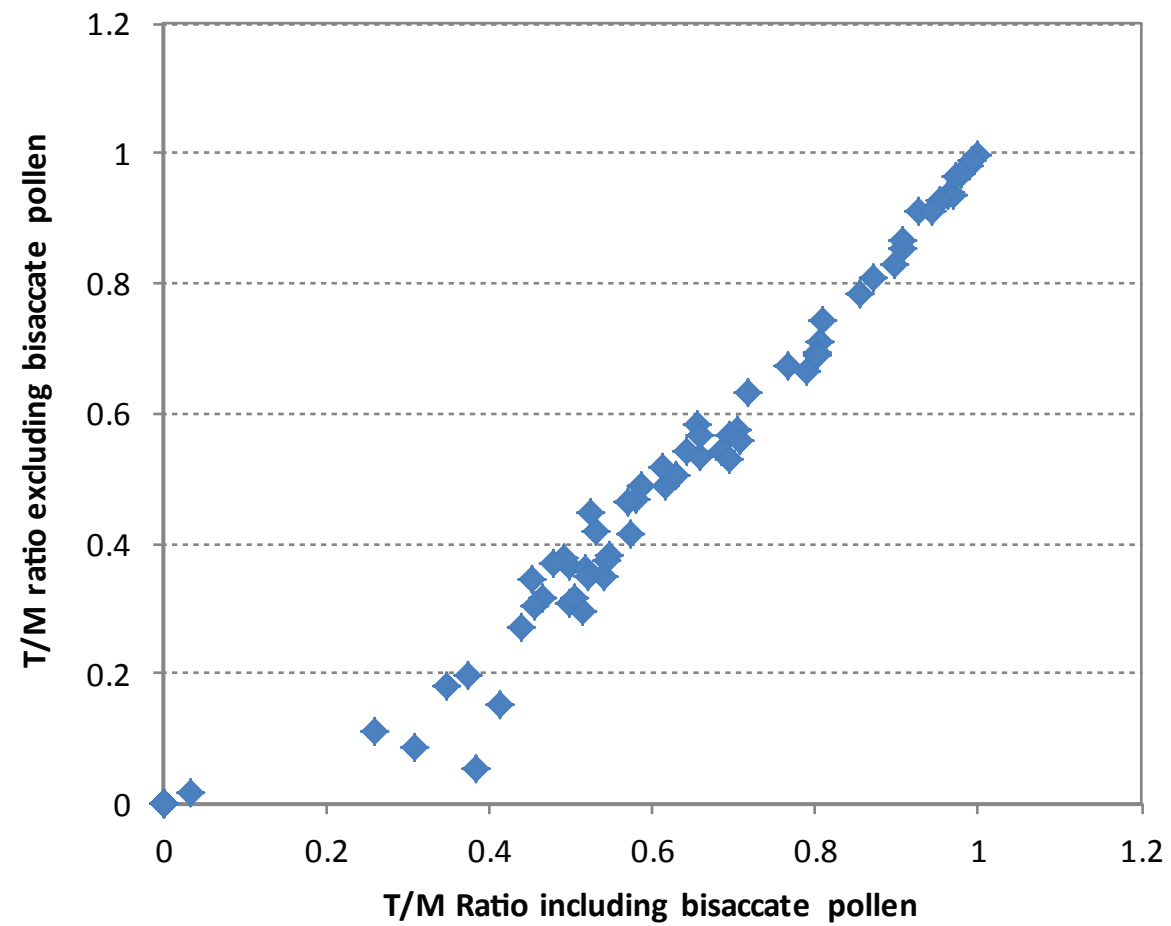

Supplement: Supplementary file 5 [file Figure S5 bisaccates.pdf › Figure S5 bisaccates.pdf]

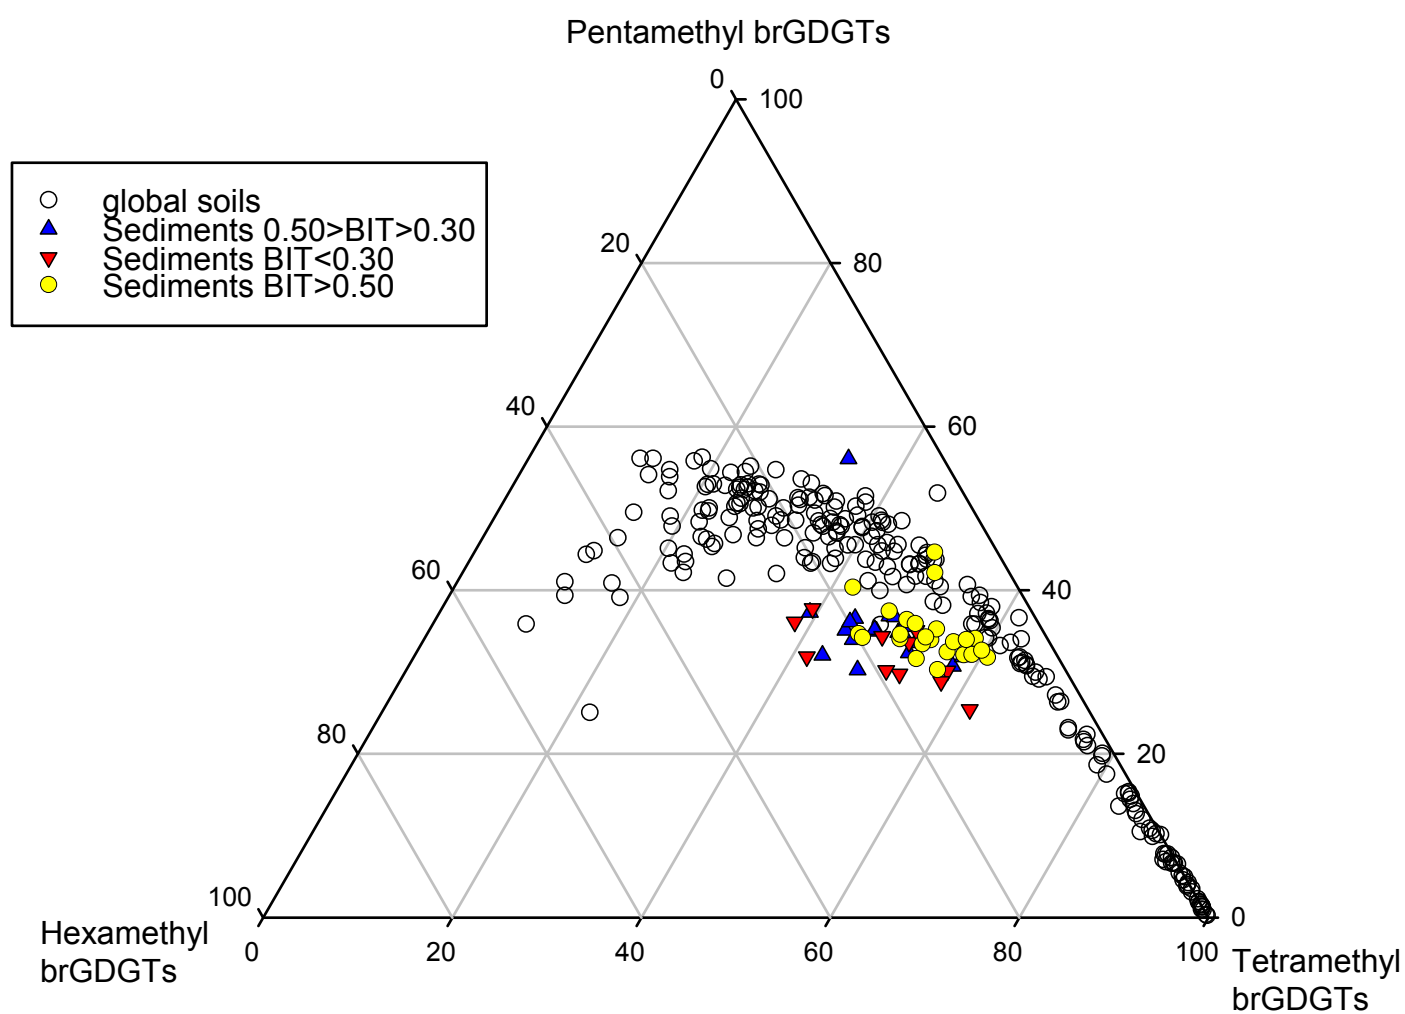

Supplement: Supplementary file 6 [file Figure S6_GDGT.pdf › Figure S6_GDGT.pdf]
